# Supplementary material for: Integrin α6β4 Upregulates Amphiregulin and Epiregulin through Base Excision Repair-Mediated DNA Demethylation and Promotes Genome-wide DNA Hypomethylation
Source: PubMed Central journal article supplement (PMC5522472; doi:10.1038/s41598-017-06351-4), 2017-07-21
Supplement: 41598_2017_6351_MOESM1_ESM.pdf [file 41598_2017_6351_MOESM1_ESM.pdf]

## Supplemental Information

# **Integrin $\alpha 6\beta 4$ Upregulates Amphiregulin and Epiregulin through Base Excision Repair-Mediated DNA Demethylation and Promotes Genome-wide DNA Hypomethylation**

**Brittany L. Carpenter<sup>1,2</sup>, Jinpeng Liu<sup>1</sup>, Lei Qi<sup>1,2</sup>, Chi Wang<sup>1,3</sup>, and Kathleen L. O'Connor<sup>1,2,\*</sup>**

<sup>1</sup>Markey Cancer Center, <sup>2</sup>Department of Molecular and Cellular Biochemistry, <sup>3</sup>Division of Cancer Biostatistics, Department of Biostatistics, University of Kentucky, Lexington, USA 40506-0509

\*To whom correspondence should be addressed:

Kathleen L. O'Connor, Ph.D.  
Markey Cancer Center  
University of Kentucky  
741 S. Limestone Street  
Lexington, KY 40506-0509 USA  
Phone: 859-323-7534 (office)  
Fax: 859-323-6030  
E-mail: [kloconnor@uky.edu](mailto:kloconnor@uky.edu)

**A.** Figure 1D. Integrin  $\beta$ 4 immunoblot

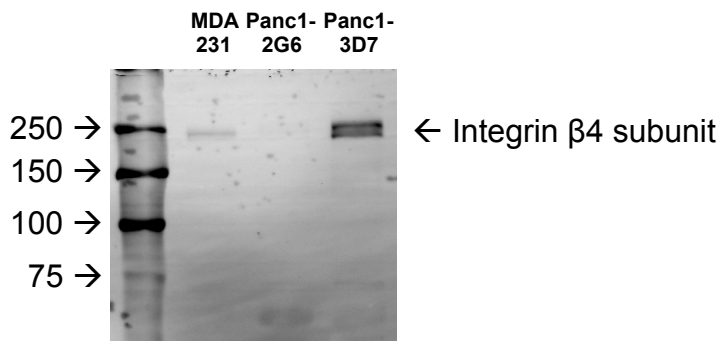

**B.** Figure 1D. Laminin-5 immunoblot

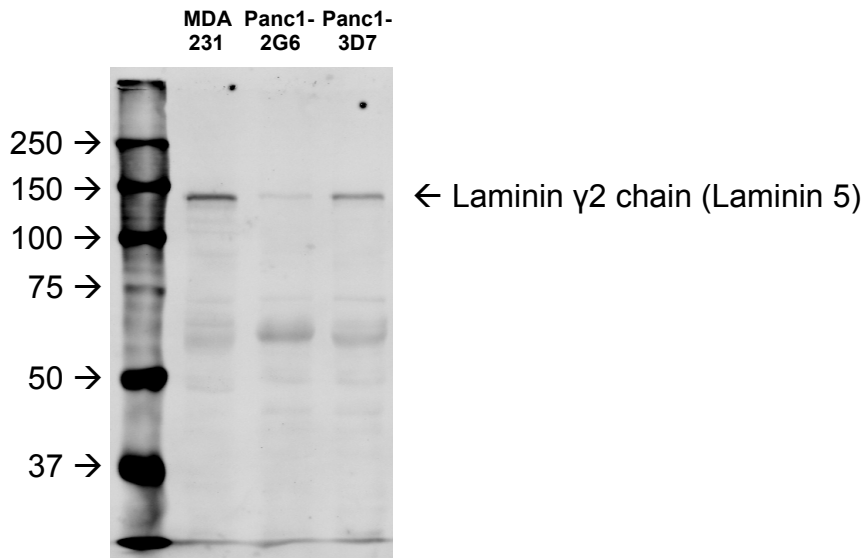

**C.** Figure 1D. Actin immunoblot

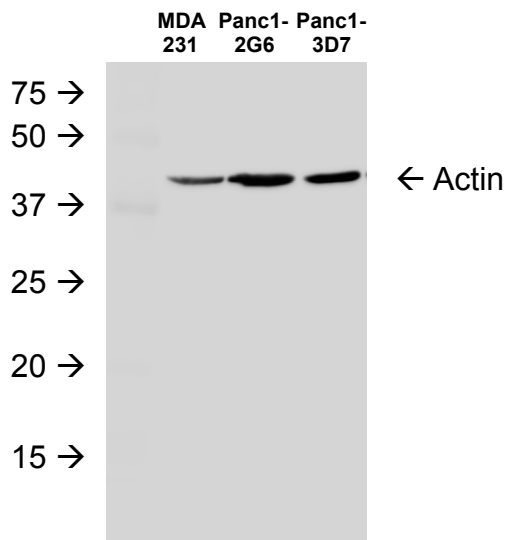

**Figure S1. Full length original images for immunoblots in Figure 1D.**

**A.** Figure 6C. TDG immunoblot

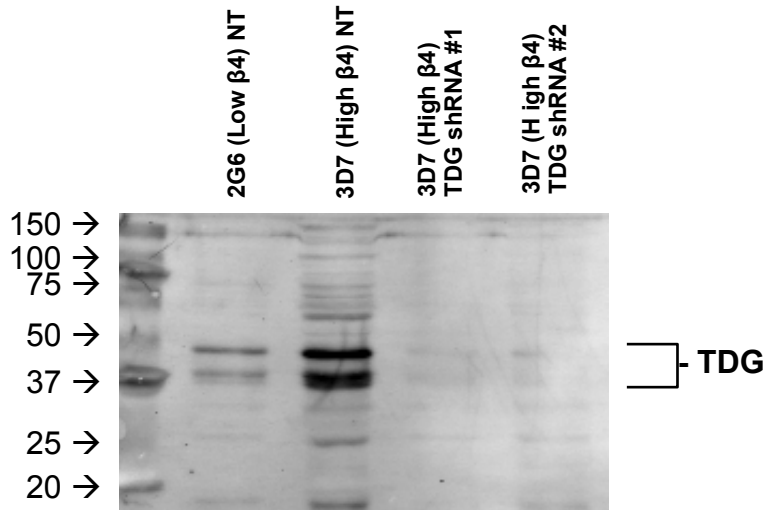

**B.** Figure 6C. Lamin A/C immunoblot

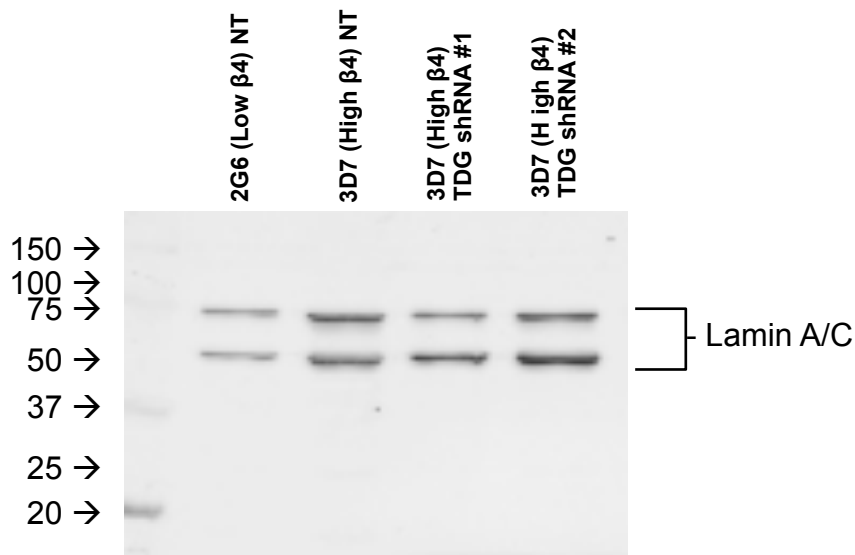

**Figure S2.** Full length original images for immunoblots in Figure 6C.
